# Supplementary material for: An electron-deficient nanosized polycyclic aromatic hydrocarbon with enhanced anion–π interactions
Source: Royal Society of Chemistry journal article supplement (doi:10.1039/c8cc06522e), 2018-01-01
Supplement: c8cc06522e1.pdf [file c8cc06522e1.pdf]

Structure p-1 (CCDC 1568403): C<sub>147</sub>H<sub>120</sub>N<sub>6</sub>O<sub>14</sub>

# start Validation Reply Form

\_vrf\_<990\_ALERT\_1\_B >;

PROBLEM: < Deprecated .res/.hkl Input Style SQUEEZE Job ... ! Note.>

RESPONSE: < Due to the crystals had large voids with badly disordered solvent molecules, the crystallographic refinement was completed with the solvent contribution subtracted from the data using SQUEEZE from the PLATON package of crystallographic software. Although we try our best to solve this problem, the problem remains because of the different solvents were used and we can't use the latest edition PLATON to exactly calculate the quantity of solvent molecule squeezed.>;

\_vrf\_<026\_ALERT\_3\_B

029\_ALERT\_3\_B \_

220\_ALERT\_2\_B

230\_ALERT\_2\_B

230\_ALERT\_2\_B

230\_ALERT\_2\_B

230\_ALERT\_2\_B

230\_ALERT\_2\_B

230\_ALERT\_2\_B

241\_ALERT\_2\_B

242\_ALERT\_2\_B

242\_ALERT\_2\_B

242\_ALERT\_2\_B

242\_ALERT\_2\_B

250\_ALERT\_2\_B

420\_ALERT\_2\_B

420\_ALERT\_2\_B >;

PROBLEM: < Ratio Observed / Unique Reflections (too) Low.. 37% Check

diffn\_measured\_fraction\_theta\_full value Low. 0.957 Why?

Non-Solvent Resd 1 C Ueq(max)/Ueq(min) Range 8.1 Ratio

Hirshfeld Test Diff for C133 --C137\_a . 7.9 s.u.

Hirshfeld Test Diff for C134 --C135 . 7.4 s.u.

Hirshfeld Test Diff for C136 --C137 . 9.3 s.u.

Hirshfeld Test Diff for C137 --C133\_a . 7.9 s.u.

Hirshfeld Test Diff for C140 --C141 . 10.3 s.u.

Hirshfeld Test Diff for C143 --C144 . 8.0 s.u.

High 'MainMol' Ueq as Compared to Neighbors of C140 Check

Low 'MainMol' Ueq as Compared to Neighbors of C121 Check

Low 'MainMol' Ueq as Compared to Neighbors of C141 Check

Low 'MainMol' Ueq as Compared to Neighbors of C143 Check

Low 'MainMol' Ueq as Compared to Neighbors of C146 Check

Large U3/U1 Ratio for Average U(i,j) Tensor .... 4.5 Note

D-H Without Acceptor O13 --H13 Please Check

D-H Without Acceptor O14 --H14 Please Check >

RESPONSE: < After the dogged refinements, some alerts (level B) have also been remarkably improved but cannot be settled satisfactorily (see the new alerts), which have been reasonably explained as following:

PLAT026\_ALERT\_3\_B Ratio Observed / Unique Reflections (too) Low .. 37% Check

PLAT029\_ALERT\_3\_B\_diffn\_measured\_fraction\_theta\_full value Low . 0.957 Why?

PLAT220\_ALERT\_2\_B Non-Solvent Resd 1 C Ueq(max)/Ueq(min) Range 8.0 Ratio

PLAT230\_ALERT\_2\_B Hirshfeld Test Diff for C3 --C6 . 7.9 s.u.

PLAT230\_ALERT\_2\_B Hirshfeld Test Diff for C03W --C048 . 7.6 s.u.

PLAT230\_ALERT\_2\_B Hirshfeld Test Diff for C04D --C04E . 9.7 s.u.

PLAT230\_ALERT\_2\_B Hirshfeld Test Diff for C04I --C04M . 9.2 s.u.

PLAT241\_ALERT\_2\_B High 'MainMol' Ueq as Compared to Neighbors of C3 Check

PLAT242\_ALERT\_2\_B Low 'MainMol' Ueq as Compared to Neighbors of C03H Check

PLAT242\_ALERT\_2\_B Low 'MainMol' Ueq as Compared to Neighbors of C04D Check

PLAT250\_ALERT\_2\_B Large U3/U1 Ratio for Average U(i,j) Tensor .... 4.3 Note

Response: Again, due to the large voids with highly volatile solvent molecules, the crystals were unstable and thus their diffraction data are too bad to settle the alerts satisfactorily. However, these alerts do not affect the main results in this manuscript.

\_vrf\_<420\_ALERT\_2\_B>;

PROBLEM: < D-H Without Acceptor O04J --H2BA Please Check.>

RESPONSE: < The solvent molecules are ethanol and the direction of H2BA is toward VOID(S).>;

\_vrf\_<910\_ALERT\_3\_B>;

PROBLEM: < Missing # of FCF Reflection(s) Below Theta(Min). 13 Note.>

RESPONSE: < This alert may be caused by several diffraction data sheltered by the beam stop.>;

# end Validation Reply Form

Structure p21c (CCDC 1568405): C<sub>66</sub>H<sub>62</sub>N<sub>3</sub>O<sub>7</sub>

# start Validation Reply Form

\_vrf\_<080\_ALERT\_2\_A

084\_ALERT\_3\_A

213\_ALERT\_2\_A

375\_ALERT\_2\_A

082\_ALERT\_2\_B

097\_ALERT\_2\_B

213\_ALERT\_2\_B

220\_ALERT\_2\_B

230\_ALERT\_2\_B

230\_ALERT\_2\_B

230\_ALERT\_2\_B

230\_ALERT\_2\_B

230\_ALERT\_2\_B

230\_ALERT\_2\_B

230\_ALERT\_2\_B

230\_ALERT\_2\_B

234\_ALERT\_4\_B

241\_ALERT\_2\_B

242\_ALERT\_2\_B

242\_ALERT\_2\_B

340\_ALERT\_3\_B

420\_ALERT\_2\_B

601\_ALERT\_2\_B>;

PROBLEM: < Maximum Shift/Error ..... 0.79 Why?

High wR2 Value (i.e. > 0.25) ..... 0.53 Report

Atom C27 has ADP max/min Ratio ..... 5.8 oblate  
 Strange C-O-H Geometry (C-O > 1.45 Ang) ..... O7 Check  
 High R1 Value ..... 0.20 Report  
 Large Reported Max. (Positive) Residual Density 1.29 eA-3  
 Atom C11 has ADP max/min Ratio ..... 4.5 prolat  
 Non-Solvent Resd 1 C Ueq(max)/Ueq(min) Range 7.6 Ratio  
 Hirshfeld Test Diff for C1 --C8 . 10.9 s.u.  
 Hirshfeld Test Diff for C3 --C4 . 11.1 s.u.  
 Hirshfeld Test Diff for C14 --C18 . 7.4 s.u.  
 Hirshfeld Test Diff for C26 --C27 . 10.8 s.u.  
 Hirshfeld Test Diff for C31 --C32 . 8.6 s.u.  
 Hirshfeld Test Diff for C39 --C40 . 16.0 s.u.  
 Hirshfeld Test Diff for C39 --C44 . 7.7 s.u.  
 Hirshfeld Test Diff for C62 --C63 . 7.5 s.u.  
 Large Hirshfeld Difference C54 --C62 0.28 Ang.  
 High 'MainMol' Ueq as Compared to Neighbors of C62 Check  
 Low 'MainMol' Ueq as Compared to Neighbors of C10 Check  
 Low 'MainMol' Ueq as Compared to Neighbors of C59 Check  
 Low Bond Precision on C-C Bonds ..... 0.01233 Ang.  
 D-H Without Acceptor O7 --H7 Please Check  
 Structure Contains Solvent Accessible VOIDS of . 135 Ang\*\*3>  
 RESPONSE: < After the dogged refinements, most of the alerts been settled satisfactorily or at least remarkably improved (see the updated CIFs, which have been re-submitted to the CCDC). For those cannot be settled satisfactorily (see the new alerts), they have been reasonably explained as following:  
 PLAT084\_ALERT\_3\_A High wR2 Value (i.e. > 0.25) ..... 0.51 Report  
 PLAT082\_ALERT\_2\_B High R1 Value ..... 0.18 Report  
 PLAT201\_ALERT\_2\_B Isotropic non-H Atoms in Main Residue(s) ..... 1 Report

PLAT220\_ALERT\_2\_B Non-Solvent Resd 1 C Ueq(max)/Ueq(min) Range 9.4 Ratio

PLAT230\_ALERT\_2\_B Hirshfeld Test Diff for O005 --C00X . 7.2 s.u.

PLAT230\_ALERT\_2\_B Hirshfeld Test Diff for O006 --C00Y . 9.8 s.u.

PLAT230\_ALERT\_2\_B Hirshfeld Test Diff for C00E --C015 . 10.6 s.u.

PLAT230\_ALERT\_2\_B Hirshfeld Test Diff for C00O --C00Q . 9.0 s.u.

PLAT230\_ALERT\_2\_B Hirshfeld Test Diff for C013 --C01G . 7.4 s.u.

PLAT230\_ALERT\_2\_B Hirshfeld Test Diff for C013 --C01P . 7.8 s.u.

PLAT230\_ALERT\_2\_B Hirshfeld Test Diff for C019 --C01B . 17.0 s.u.

PLAT230\_ALERT\_2\_B Hirshfeld Test Diff for C019 --C01E . 9.5 s.u.

PLAT230\_ALERT\_2\_B Hirshfeld Test Diff for C01C --C01M . 9.6 s.u.

PLAT234\_ALERT\_4\_B Large Hirshfeld Difference C01T --C022 0.28 Ang.

PLAT234\_ALERT\_4\_B Large Hirshfeld Difference C01U --C020 0.26 Ang.

PLAT340\_ALERT\_3\_B Low Bond Precision on C-C Bonds ..... 0.01187 Ang.

Response: Similarly, due to the large voids with highly volatile solvent molecules, the crystals were unstable and thus their diffraction data are too bad to settle the alerts satisfactorily. However, these alerts do not affect the main results in this manuscript.>;

\_vrf\_<910\_ALERT\_3\_B>;

PROBLEM: < Missing # of FCF Reflection(s) Below Theta(Min). 29 Note.>

RESPONSE: < Similarly, alert may be caused by several diffraction data sheltered by the beam stop.>;

\_vrf\_<990\_ALERT\_1\_B>;

PROBLEM: < Deprecated .res/.hkl Input Style SQUEEZE Job ... ! Note.>

RESPONSE: < Due to the crystals had large voids with badly disordered solvent molecules, the crystallographic refinement was completed with the solvent contribution subtracted from the data using SQUEEZE from the PLATON package of crystallographic software. Although we try our best to solve this problem, the problem remains because of the different solvents were used and we can't use the latest edition PLATON to exactly calculate the quantity of solvent molecule squeezed.>;

# end Validation Reply Form
